# Supplementary material for: Association of Cardiovascular Disease Risk Factor Burden With Progression of Coronary Atherosclerosis Assessed by Serial Coronary Computed Tomographic Angiography
Source: PubMed Central journal article supplement (PMC7382001; doi:10.1001/jamanetworkopen.2020.11444), 2020-07-24
Supplement: jamanetwopen-3-e2011444-s001.pdf [file jamanetwopen-3-e2011444-s001.pdf]

## Supplementary Online Content

Han D, Berman DS, Miller RJH, et al. Association of cardiovascular disease risk factor burden with progression of coronary atherosclerosis assessed by serial coronary computed tomographic angiography. *JAMA Netw Open*. 2020;3(7):e2011444.  
doi:10.1001/jamanetworkopen.2020.11444

**eTable 1.** Annualized PAV Progression and Development of New APC According to ASCVD Risk Score

**eTable 2.** Baseline Characteristics of Patients With High ASCVD Risk According to Rapid Plaque Progression

**eTable 3.** Difference Between Analyzed and Excluded Patients Due to Image Quality

**eFigure.** Association Between ASCVD Risk Score and Annualized Plaque Progression

This supplementary material has been provided by the authors to give readers additional information about their work.

**eTable 1.** Annualized PAV Progression and Development of New APC According to ASCVD Risk Score

|                            | All           | Low risk      | Intermediate risk | High risk     | <i>P</i> value for trend | <i>P</i> value for low vs. intermediate | <i>P</i> value for low to intermediate vs. high |
|----------------------------|---------------|---------------|-------------------|---------------|--------------------------|-----------------------------------------|-------------------------------------------------|
| Total plaque               | 0.592 ± 0.859 | 0.454 ± 0.734 | 0.584 ± 0.753     | 0.989 ± 1.207 | <.001                    | .03                                     | <.001                                           |
| Calcified plaque           | 0.342 ± 0.616 | 0.233 ± 0.506 | 0.356 ± 0.611     | 0.607 ± 0.797 | <.001                    | .004                                    | <.001                                           |
| Noncalcified plaque        | 0.250 ± 0.733 | 0.220 ± 0.662 | 0.227 ± 0.600     | 0.382 ± 1.089 | <.001                    | .88                                     | .01                                             |
| Fibrous plaque             | 0.220 ± 0.524 | 0.209 ± 0.503 | 0.206 ± 0.442     | 0.280 ± 0.712 | .26                      | .93                                     | .10                                             |
| Fibrofatty plaque          | 0.029 ± 0.349 | 0.013 ± 0.329 | 0.025 ± 0.285     | 0.085 ± 0.499 | .07                      | .62                                     | .02                                             |
| Low-attenuation plaque     | 0.002 ± 0.008 | 0.000 ± 0.082 | 0.002 ± 0.08      | 0.017 ± 0.082 | .03                      | .85                                     | .008                                            |
| New positive remodeling    | 357 (35.5)    | 151 (32.6)    | 133 (35.7)        | 73 (43.2)     | .05                      | .36                                     | .02                                             |
| New low-attenuation plaque | 105 (10.4)    | 44 (9.5)      | 35 (9.4)          | 26 (15.4)     | .07                      | .95                                     | .02                                             |
| New spotty calcification   | 143 (14.2)    | 52 (11.2)     | 54 (14.5)         | 37 (21.9)     | .003                     | .16                                     | .002                                            |

Abbreviations: ASCVD, atherosclerotic cardiovascular disease; PAV, percent atheroma volume; APC, adverse plaque characteristics

Values are shown as mean ± standard deviation or number (percentage).

**eTable 2.** Baseline Characteristics of Patients With High ASCVD Risk According to Rapid Plaque Progression

|                                | No rapid progression<br>(n = 92) | Rapid progression<br>(n = 77) | <i>P</i> value |
|--------------------------------|----------------------------------|-------------------------------|----------------|
| Age, y                         | 69 ± 6                           | 69±5.2                        | .99            |
| Male                           | 27 (29.3)                        | 50 (64.9)                     | .02            |
| Body mass index                | 25.7 ± 30                        | 25.8±3.6                      | .76            |
| Clinical symptoms              |                                  |                               | .24            |
| Asymptomatic                   | 21 (22.8)                        | 8 (10.4)                      | .03            |
| Shortness of breath            | 6 (6.5)                          | 6 (7.8)                       | .75            |
| Atypical chest pain            | 58 (63.0)                        | 55 (71.4)                     | .25            |
| Noncardiac chest pain          | 5 (5.4)                          | 3 (3.9)                       | .64            |
| Typical chest pain             | 2 (2.2)                          | 4 (5.2)                       | .29            |
| Hypertension                   | 56 (60.9)                        | 59 (76.6)                     | .04            |
| Diabetes                       | 36 (39.1)                        | 48 (62.3)                     | .003           |
| Dyslipidemia                   | 35 (38.0)                        | 28 (36.4)                     | .78            |
| Current smoker                 | 22 (23.9)                        | 32 (41.6)                     | .01            |
| ASCVD score                    | 27.5 ± 8.5                       | 29.9 ± 10.6                   | .10            |
| Baseline CCTA characteristics  |                                  |                               |                |
| Presence of any plaque         | 76 (82.6)                        | 77 (100.0)                    | <.001          |
| Plaque volume, mm <sup>3</sup> |                                  |                               |                |
| Total plaque                   | 57.8 (20.5-120.3)                | 185.7 (93.9-367.7)            | <.001          |
| Calcified plaque               | 13.6 (0-43.3)                    | 56.7 (23.4-129.2)             | <.001          |
| Noncalcified plaque            | 38.9 (10.4-85.3)                 | 118.5 (52.7-228.4)            | <.001          |
| Fibrous plaque                 | 26.1 (7.2-60.4)                  | 79.8 (40.2-156.3)             | <.001          |
| Fibrofatty plaque              | 5.3 (0.2-25.4)                   | 19.5 (4.2-52.7)               | <.001          |
| Low-attenuation plaque         | 0.1 (0-1.9)                      | 0.72 (0-5.4)                  | .01            |
| APCs                           |                                  |                               |                |
| Any APCs                       | 72 (78.3)                        | 76 (98.7)                     | <.001          |
| Positive remodeling            | 70 (76.1)                        | 74 (96.1)                     | <.001          |
| Low-attenuation plaque         | 19 (20.7)                        | 30 (38.9)                     | .009           |
| Spotty calcification           | 22 (23.9)                        | 26 (33.8)                     | .12            |

Abbreviations: APC, adverse plaque characteristics; ASCVD, atherosclerotic cardiovascular disease; CCTA, coronary computed tomographic angiography.

Values are shown as mean ± standard deviation, median (interquartile range) or number (percentage).

**eTable 3.** Difference Between Analyzed and Excluded Patients Due to Image Quality

|                         | Analyzed (n = 1005) | Excluded due to image quality (n = 754) | <i>P</i> value |
|-------------------------|---------------------|-----------------------------------------|----------------|
| Age, y                  | 60 ± 8              | 63 ± 10                                 | <.001          |
| Male                    | 575 (57.2)          | 502 (66.6)                              | <.001          |
| Body mass index         | 25.3 ± 3.1          | 25.6 ± 3.6                              | .02            |
| Clinical symptoms       |                     |                                         | .26            |
| Asymptomatic            | 135 (13.4)          | 287 (38.1)                              | <.001          |
| Shortness of breath     | 53 (5.3)            | 70 (9.3)                                | .004           |
| Atypical chest pain     | 694 (69.1)          | 348 (46.2)                              | <.001          |
| Noncardiac chest pain   | 80 (7.9)            | 47 (6.2)                                | .04            |
| Typical chest pain      | 37 (3.7)            | 45 (5.9)                                | .02            |
| Hypertension            | 505 (50.3)          | 485 (64.3)                              | <.001          |
| Diabetes                | 198 (19.7)          | 208 (27.6)                              | <.001          |
| Dyslipidemia            | 396 (39.4)          | 360 (47.8)                              | <.001          |
| Current smoker          | 181 (18.0)          | 150 (19.9)                              | .22            |
| Medications at baseline |                     |                                         |                |
| Aspirin                 | 350 (34.8)          | 405 (53.7)                              | <.001          |
| Beta blocker            | 232 (23.1)          | 345 (45.8)                              | <.001          |
| ACE inhibitor/ARB       | 266 (26.5)          | 296 (39.3)                              | <.001          |
| Statin use              | 363 (36.2)          | 420 (55.7)                              | <.001          |

Abbreviations: ACE, angiotensin-converting enzyme; ARB, angiotensin II receptor blockers; ASCVD, atherosclerotic cardiovascular disease.

Values are shown as mean ± standard deviation or number (percentage).

**eFigure.** Association Between ASCVD Risk Score and Annualized Plaque Progression

A) Total plaque

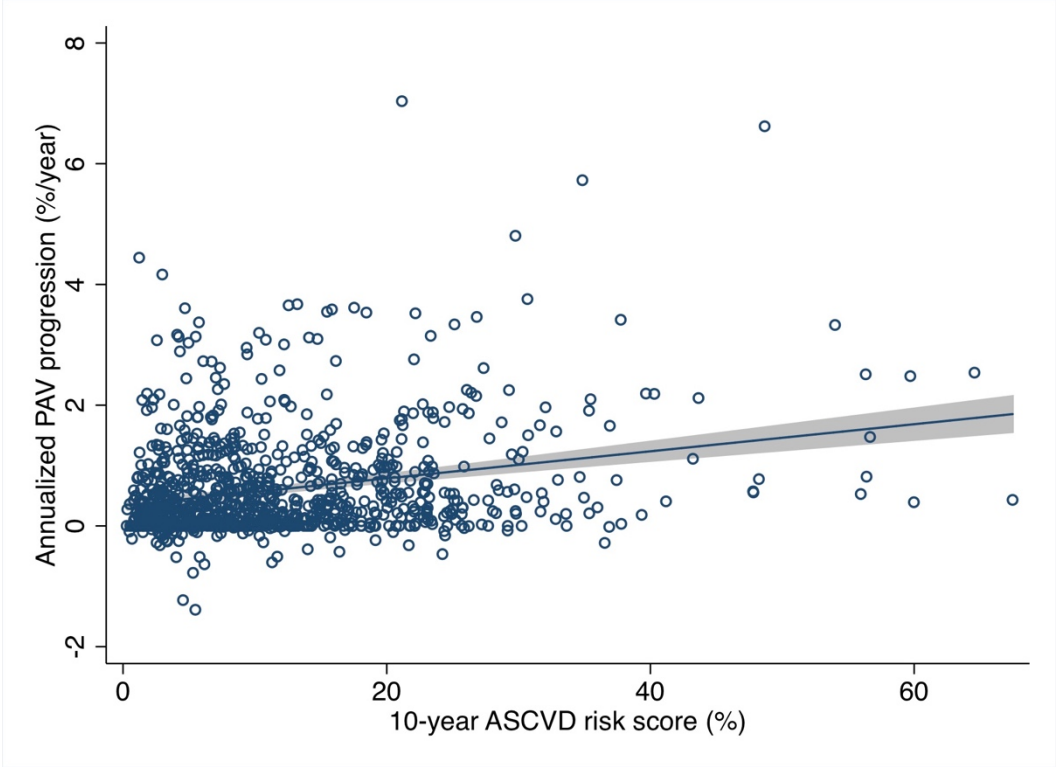

Abbreviation: ASCVD, atherosclerotic cardiovascular disease. PAV, Percent atheroma volume

B) Calcified plaque

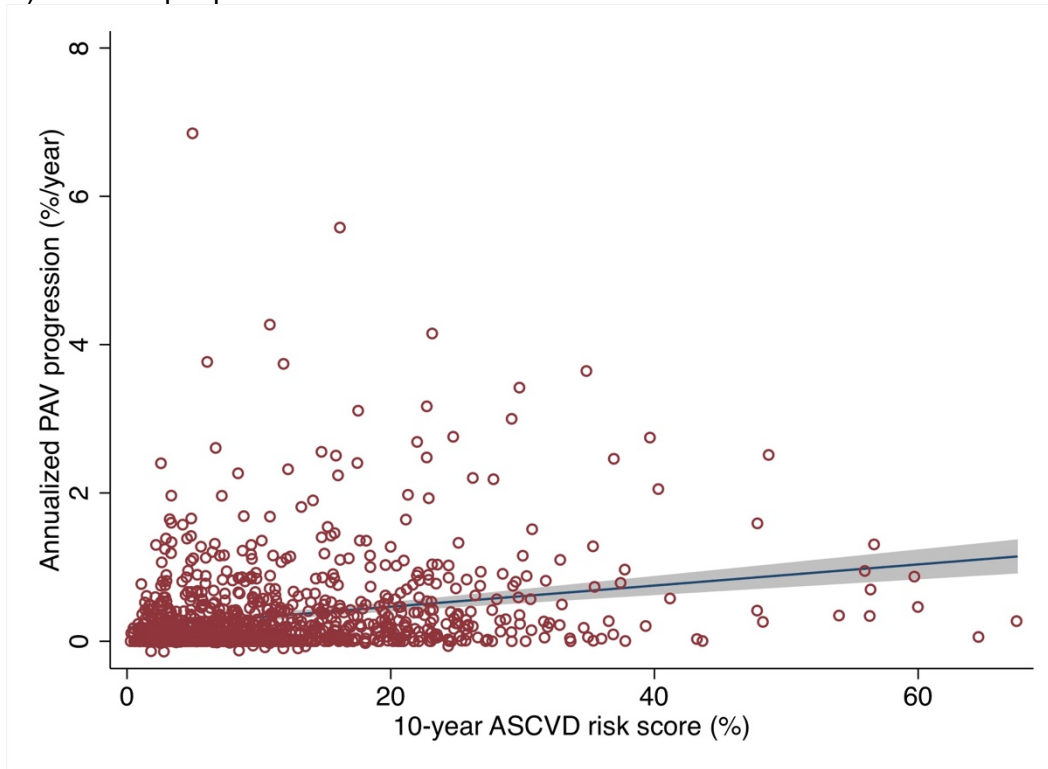

Abbreviation: ASCVD, atherosclerotic cardiovascular disease. PAV, Percent atheroma volume

C) Noncalcified plaque

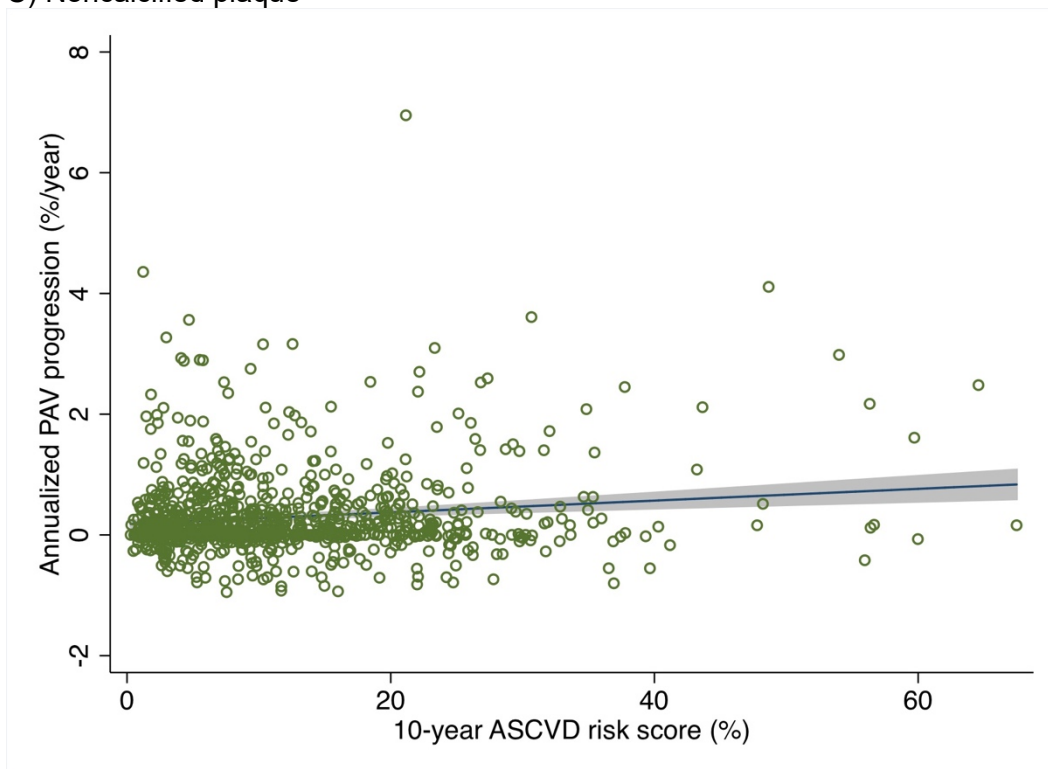

Abbreviation: ASCVD, atherosclerotic cardiovascular disease. PAV, Percent atheroma volume
